## CORRECTION

# Correction: Community members and healthcare workers' priorities for the control and prevention of snakebite envenoming in Ghana

The *Neglected Tropical Diseases* Staff

There are errors in the author affiliations. The correct affiliations are as follows:

Leslie Mawuli Aglanu<sup>1,2,3</sup>, John Humphrey Amuasi<sup>2,3,4,5</sup>, Evie Prokesh<sup>1</sup>, Alexis Beyuo<sup>6</sup>, Chrisantus Danaah Dari<sup>7</sup>, Sofanne J. Ravensbergen<sup>1</sup>, Melvin Katey Agbogbaley<sup>2,8</sup>, Austin Gideon Adobasom Anane<sup>2,4</sup>, Kabiru Mohammed Abass<sup>9</sup>, David G Lalloo<sup>10</sup>, Jörg Blessmann<sup>8</sup>, Benno Kreuels<sup>5,8</sup>, Ymkje Stienstra<sup>1,10</sup>

## Affiliations

**1** University Medical Centre Groningen, Department of Internal Medicine/Infectious Diseases, University of Groningen, Groningen, The Netherlands

**2** Global Health and Infectious Diseases Research Group, Kumasi Centre for Collaborative Research in Tropical Medicine, Kumasi, Ghana

**3** Research Group Global One Health, Department of Implementation Research, Bernhard Nocht Institute for Tropical Medicine, Hamburg, Germany

**4** Department of Global Health, School of Public Health, Kwame Nkrumah University of Science and Technology, Kumasi, Ghana

**5** Division for Tropical Medicine, Department of Medicine, University Medical Centre Hamburg-Eppendorf, Hamburg, Germany

**6** Department of Development Studies, Simon Diedong Dombo University of Business and Integrated Development Studies, Upper West Region, Wa, Ghana

**7** Regional Health Directorate, Ghana Health Service, Upper West Region, Wa, Ghana

**8** Research Group Snakebite Envenoming, Department of Implementation Research, Bernhard Nocht Institute for Tropical Medicine, Hamburg, Germany

**9** Presbyterian Hospital, Agogo, Ashanti Region, Ghana

**10** Centre for Snakebite Research and Interventions, Liverpool School of Tropical Medicine, Liverpool, United Kingdom

## Reference

1. Aglanu LM, Amuasi JH, Prokesh E, Beyuo A, Dari CD, Ravensbergen SJ, et al. (2023) Community members and healthcare workers' priorities for the control and prevention of snakebite envenoming in Ghana. *PLoS Negl Trop Dis* 17(7): e0011504. <https://doi.org/10.1371/journal.pntd.0011504> PMID: 37478151

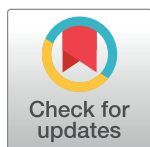

## OPEN ACCESS

**Citation:** The *Neglected Tropical Diseases* Staff (2023) Correction: Community members and healthcare workers' priorities for the control and prevention of snakebite envenoming in Ghana. *PLoS Negl Trop Dis* 17(10): e0011711. <https://doi.org/10.1371/journal.pntd.0011711>

**Published:** October 23, 2023

**Copyright:** © 2023 The Neglected Tropical Diseases Staff. This is an open access article distributed under the terms of the [Creative Commons Attribution License](https://creativecommons.org/licenses/by/4.0/), which permits unrestricted use, distribution, and reproduction in any medium, provided the original author and source are credited.
